# Supplementary material
Source: PubMed Central journal article supplement (PMC7899036)
Supplement: mmc1.pdf [file mmc1.pdf]

## *Epidemiology and Infection*

Title: Efficacy and Safety of Hydroxychloroquine/chloroquine against SARS-CoV-2

Infection: A Systematic Review

Author list: Jogender Kumar<sup>1</sup>, Siddharth Jain<sup>1</sup>, Arushi Yadav<sup>2</sup>, Jitendra Meena<sup>1\*</sup>

<sup>1</sup>Post Graduate Institute of Medical Education and Research, Chandigarh; India

<sup>2</sup>Government Medical College and Hospital, Chandigarh; India

## Supplementary Material

**Table S1: Search Strategy**

|                  |                                                                                                                                                                                                                                                                                                                                                                                                                                                                                             |                                                         |
|------------------|---------------------------------------------------------------------------------------------------------------------------------------------------------------------------------------------------------------------------------------------------------------------------------------------------------------------------------------------------------------------------------------------------------------------------------------------------------------------------------------------|---------------------------------------------------------|
| PubMed           | ((((("hydroxychloroquine"[MeSH Terms] ) OR ("hydroxychloroquine"[Title/Abstract])) OR (chloroquine[Title/Abstract])) OR (chloroquine[MeSH Terms])) AND (((((( ("severe acute respiratory syndrome coronavirus 2"[Supplementary Concept] ) OR (coronavirus[MeSH Terms])) OR ("severe acute respiratory syndrome coronavirus 2"[Title/Abstract])) OR ("2019 ncov"[Title/Abstract])) OR ("covid 19"[Title/Abstract])) OR ("sars cov 2"[Title/Abstract])) OR ("coronavirus"[Title/Abstract])))) |                                                         |
| Embase           | 'severe acute respiratory syndrome coronavirus 2':ab,ti OR 'coronavirus disease 2019':ab,ti OR 'sars cov 2':ab,ti) AND (hydroxychloroquine:ab,ti OR chloroquine:ab,ti)                                                                                                                                                                                                                                                                                                                      |                                                         |
| Web of Science   | TS=(hydroxychloroquine OR Chloroquine) AND TS=(SARS-CoV-2 OR Coronavirus OR Coronavirus 2019 OR COVID-19)                                                                                                                                                                                                                                                                                                                                                                                   |                                                         |
| Cochrane Library | ID                                                                                                                                                                                                                                                                                                                                                                                                                                                                                          | Search                                                  |
|                  | #1                                                                                                                                                                                                                                                                                                                                                                                                                                                                                          | COVID-19                                                |
|                  | #2                                                                                                                                                                                                                                                                                                                                                                                                                                                                                          | Coronavirus                                             |
|                  | #3                                                                                                                                                                                                                                                                                                                                                                                                                                                                                          | SARS-CoV-2                                              |
|                  | #4                                                                                                                                                                                                                                                                                                                                                                                                                                                                                          | severe acute respiratory syndrome coronavirus 2         |
|                  | #5                                                                                                                                                                                                                                                                                                                                                                                                                                                                                          | #1 or #2 or #3 or #4                                    |
|                  | #6                                                                                                                                                                                                                                                                                                                                                                                                                                                                                          | MeSH descriptor: [SARS virus] explode all trees         |
|                  | #7                                                                                                                                                                                                                                                                                                                                                                                                                                                                                          | #5 or #6                                                |
|                  | #8                                                                                                                                                                                                                                                                                                                                                                                                                                                                                          | hydroxychloroquine                                      |
|                  | #9                                                                                                                                                                                                                                                                                                                                                                                                                                                                                          | chloroquine                                             |
|                  | #10                                                                                                                                                                                                                                                                                                                                                                                                                                                                                         | #8 or #9                                                |
|                  | #11                                                                                                                                                                                                                                                                                                                                                                                                                                                                                         | MeSH descriptor: [Hydroxychloroquine] explode all trees |
|                  | #12                                                                                                                                                                                                                                                                                                                                                                                                                                                                                         | #10 or #11                                              |
| #13              | #7 AND #12                                                                                                                                                                                                                                                                                                                                                                                                                                                                                  |                                                         |

**Supplementary Table S2: Risk of Bias assessment for Cohort studies**

| Study                | Selection                                |                                     |                           |                                                                          | Comparability                              |                               | Outcome               |                  |                        | Quality |
|----------------------|------------------------------------------|-------------------------------------|---------------------------|--------------------------------------------------------------------------|--------------------------------------------|-------------------------------|-----------------------|------------------|------------------------|---------|
|                      | Representativeness of the exposed cohort | Selection of the non-exposed cohort | Ascertainment of exposure | Demonstration that outcome of interest was not present at start of study | Adjust for the most important risk factors | Adjust for other risk factors | Assessment of outcome | Follow up length | Loss to follow up rate |         |
| Huang et al. 2020    | *                                        | *                                   | *                         | *                                                                        | -                                          | -                             | *                     | *                | *                      | Fair    |
| Grimaldi et al. 2020 | *                                        | *                                   | *                         | *                                                                        | -                                          | -                             | *                     | *                | *                      | Fair    |
| Karolyiet al. 2020   | -                                        | *                                   | *                         | *                                                                        | -                                          | -                             | *                     | *                | *                      | Poor    |

**Supplementary Table3: Subgroup analysis: As per disease severity**

| Outcome                                               | Type of Study      | Mild to moderate disease      |                    | All categories (including Severe Disease) |                       |
|-------------------------------------------------------|--------------------|-------------------------------|--------------------|-------------------------------------------|-----------------------|
|                                                       |                    | No. of studies (Participants) | RR/RD (95% CI)     | No. of studies (Participants)             | RR/RD (95% CI)        |
| All-cause mortality                                   | RCT                | 5 (2337)                      | 1.20 (0.47 - 3.06) | 4 (6834)                                  | 1.1 (1.00 - 1.21)     |
|                                                       | Prospective Cohort | 1 (373)                       | -                  | 2 (414)                                   | 0.84 (0.27 - 2.62)    |
| Need for mechanical ventilation (post randomization)  | RCT                | 1 (332)                       | 1.09 (0.50 - 2.35) | 3 (5970)                                  | 1.12 (0.95 - 1.33)    |
| Need for ICU admission (post randomization/enrolment) | RCT                | -                             | -                  | 2 (224)                                   | 0.85 (0.40 - 1.79)    |
|                                                       | Prospective Cohort | 1 (373)                       | -                  | 1 (109)                                   | 38.57 (2.16 - 689.10) |
| Clinical Recovery                                     | RCT                | -                             | -                  | 2 (4910)                                  | 1.19 (0.72 - 1.95)    |

|                                                                  |                    |          |                      |  |          |                      |
|------------------------------------------------------------------|--------------------|----------|----------------------|--|----------|----------------------|
| Radiological recovery                                            | RCT                |          |                      |  | 1 (62)   | 1.47 (1.02 - 2.11)   |
| Virological Recovery by day 28 of illness (PCR becomes negative) | RCT                | 1 (150)  | 0.95 (0.78 - 1.15)   |  | 1 (30)   | 1.00 (0.88 - 1.13)   |
|                                                                  | Prospective Cohort | 1 (373)  | 1.21 (1.11 - 1.31)   |  |          |                      |
| Progression to severe disease                                    | RCT                | 1 (150)  | 3.00 (0.12 - 72.49)  |  |          |                      |
| Serious adverse events                                           | RCT                | 6 (4645) | 0.83 (0.40 - 1.72)   |  | 2 (2186) | 1.30 (0.95 - 1.78)   |
| Time to clinical recovery                                        | RCT                | 1 (150)  | 1.00 (0.02 - 1.98)   |  | 1 (194)  | -0.09 (-0.78 - 0.60) |
| Time to virological recovery                                     | RCT                | 1 (150)  | 1.00 (0.03 - 1.97)   |  | 1 (194)  | -0.63 (-1.40 - 0.14) |
|                                                                  | Prospective Cohort | 1 (373)  | -6.00 (-6.69, -5.31) |  | 1 (109)  | -2.50 (-5.88 - 0.88) |
| Duration of hospital stay                                        | RCT                | 1 (332)  | 0.10 (-1.37 - 1.57)  |  | 1 (194)  | -0.23 (-0.92 - 0.46) |
|                                                                  | Prospective Cohort | 1 (373)  | -1.00 (-2.15 - 0.15) |  | 1 (109)  | -1.00 (-3.19 - 1.19) |
